# Supplementary material for: CDCA3 Is a Novel Prognostic Biomarker Associated with Immune Infiltration in Hepatocellular Carcinoma
Source: PubMed Central journal article supplement (PMC7869413; doi:10.1155/2021/6622437), 2021-01-29

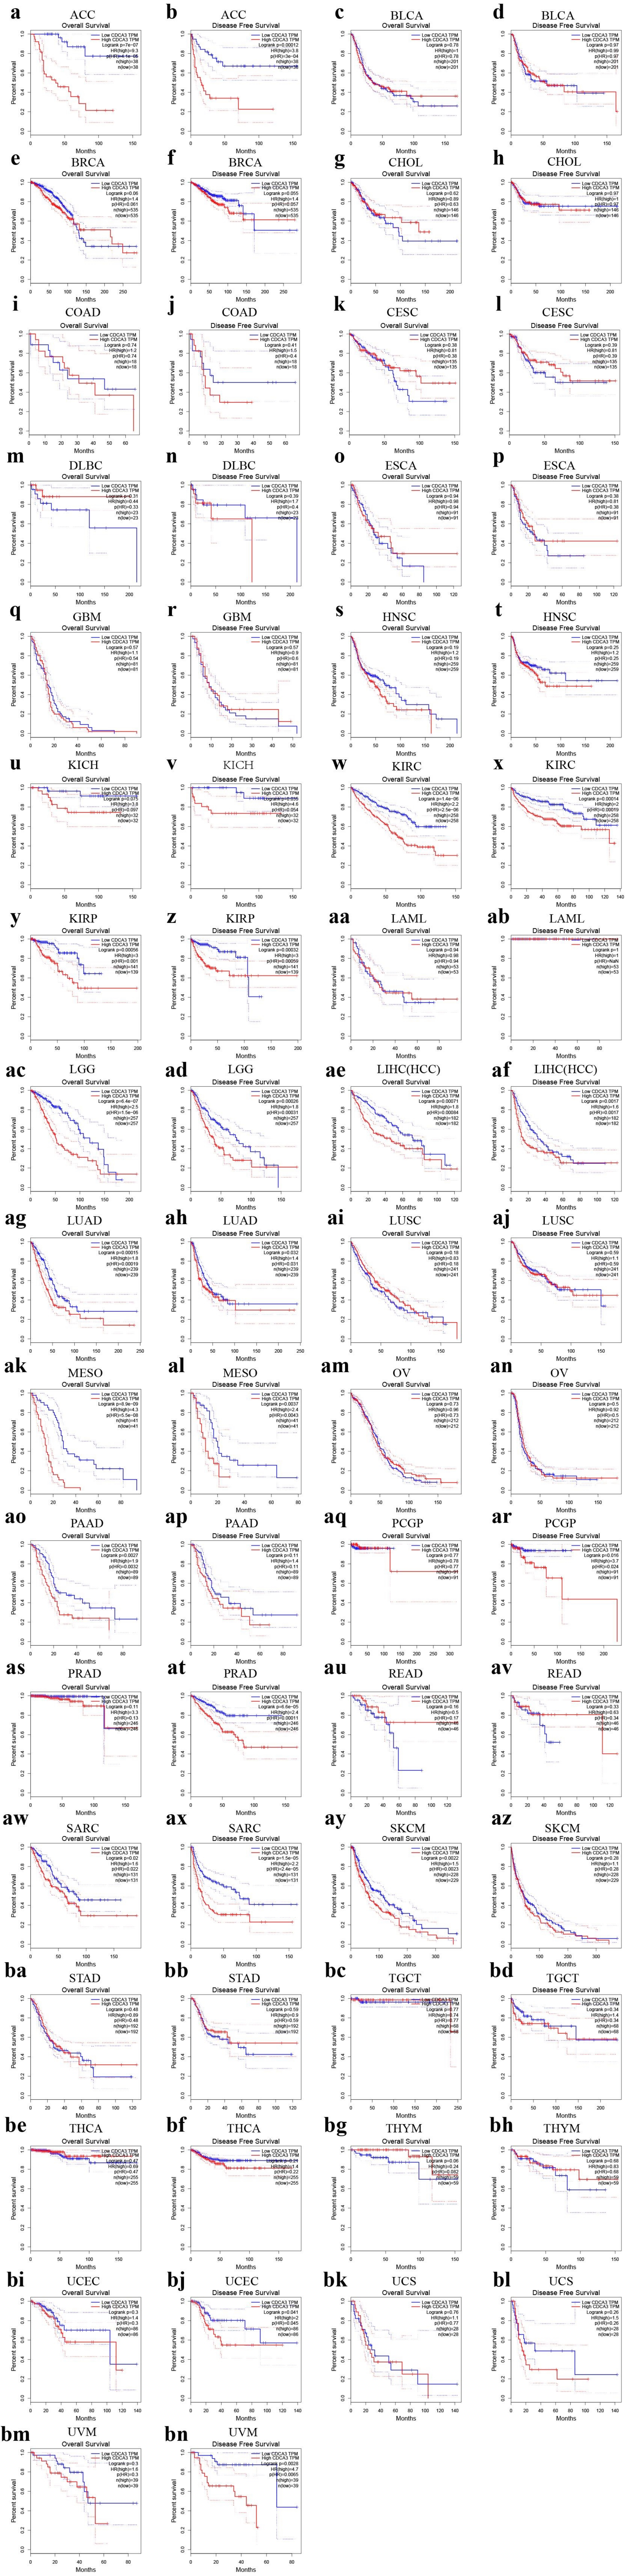

Supplement: 6622437.f1.pdf [file 6622437.f1.pdf]
